# Supplementary material
Source: PubMed Central journal article supplement (PMC3035324)
Supplement: NIHMS264569-supplement-1.pdf [file NIHMS264569-supplement-1.pdf]

## Supplementary Material

### **An ion-channel-containing model membrane: structural determination by magnetic contrast neutron reflectometry**

Stephen A. Holt,<sup>\*a</sup> Anton P. Le Brun,<sup>b</sup> Charles F. Majkrzak,<sup>c</sup> Duncan J. McGillivray,<sup>c,e</sup> Frank Heinrich,<sup>c,d</sup> Mathias Lösche<sup>c,d</sup> and Jeremy H. Lakey<sup>b</sup>

- a ISIS, Rutherford Appleton Laboratory, Science and Technology Facilities Council, Didcot, OX11 0QX, UK.; Stephen.Holt@stfc.ac.uk
- b Institute for Cell and Molecular Biosciences, Newcastle University, Newcastle-upon-Tyne, NE2 4HH, UK.; E-mail: Anton.Le-Brun@newcastle.ac.uk; j.h.lakey@ncl.ac.uk
- c NIST Center for Neutron Research, National Institute of Standards and Technology, Gaithersburg, Maryland 20899-6102, USA; E-mail: charles.majkrzak@nist.gov; frank.heinrich@nist.gov
- d Department of Physics, Carnegie Mellon University, Pittsburgh, PA 15213-3890, USA.; E-mail: loesche+@andrew.cmu.edu
- e Now at: Department of Chemistry, The University of Auckland, Auckland 1142, NZ.; E-mail: d.mcgillivray@auckland.ac.nz

Keywords: OmpF; Outer membrane; porin; neutron reflection; magnetic contrast; thiolipid

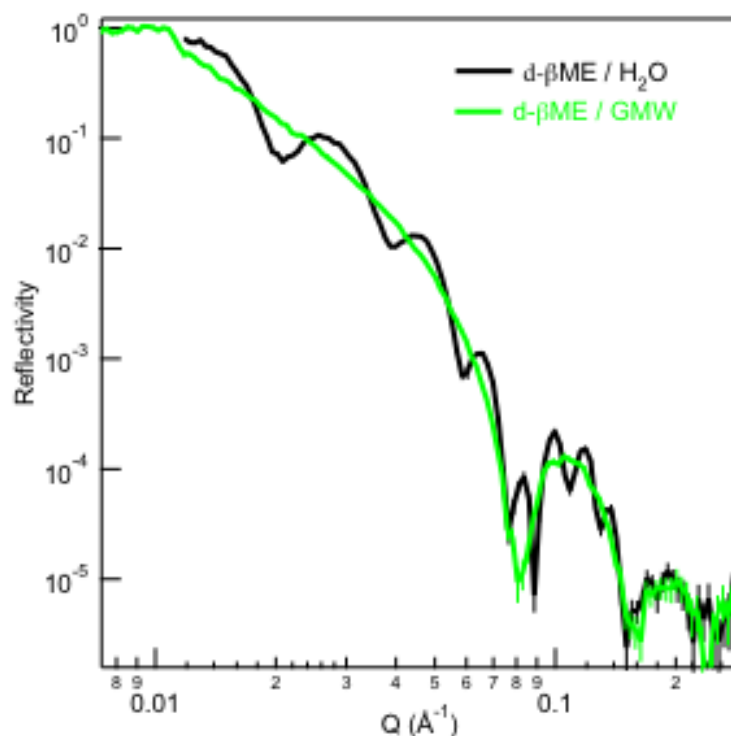

Figure S1. Reflectivity datasets, “up” spin state only for different  $\beta$ ME contrast conditions. Data presented as lines between points to enable ready tracing of the fringes. The minima of the broad fringe ( $\sim 0.08$  and  $0.15 \text{ \AA}^{-1}$ ) is due to the thickness of the magnetic reference layer. The critical edge it is at  $\sim 0.1 \text{ \AA}^{-1}$  for gold matched water (GMW), green, buffer and is absent for  $\text{H}_2\text{O}$  buffer, black, where the change in nSLD from the silicon to the buffer is negative. The absence of small fringes in the GMW dataset is because the buffer contrast is matched to the gold, which approximates the nSLD of the d- $\beta$ ME. When the buffer is replaced with  $\text{H}_2\text{O}$  the small fringes are evident as the gold and d- $\beta$ ME layers are now visible.

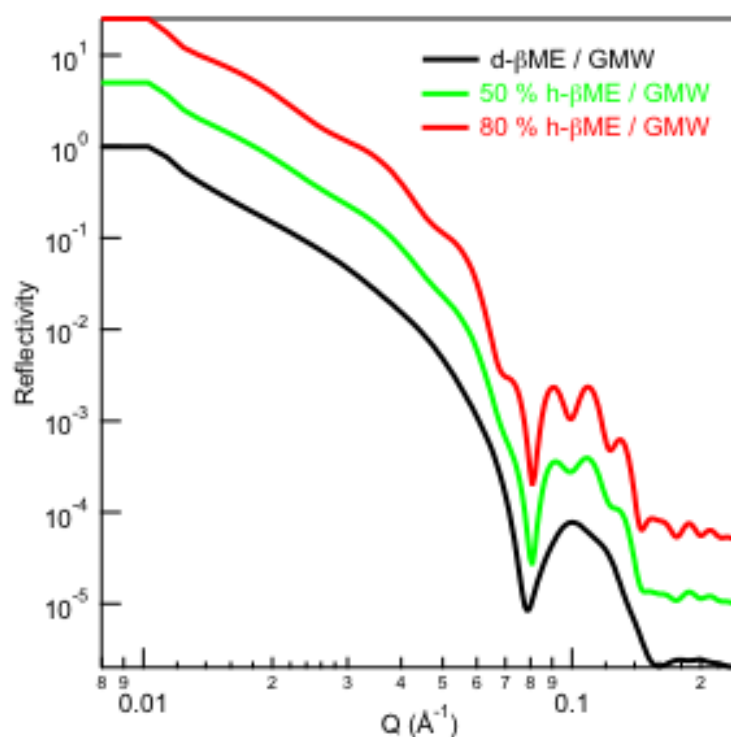

Figure S2. Simulated reflectivity datasets based upon the fits for data shown in Fig. S1 with simulations offset for clarity. Black – simulated version of d- $\beta$ ME with GMW subphase, note the asymmetry in shape of the fringe (maximum  $\sim 0.1$ ) is because the d- $\beta$ ME does not exactly match the gold nSLD. Green simulation is for the same gold and magnetic layer structure and GMW buffer but with the surface covered with 50 % h- $\beta$ ME. Red simulation is with increased h- $\beta$ ME surface coverage. The simulations clearly illustrate the sensitivity of the data to the surface adsorption of very thin layers of hydrogenous material.
